# Supplementary material for: Deletion of the Natural Killer Cell Receptor NKG2C Encoding KLR2C Gene and Kidney Transplant Outcome
Source: PubMed Central journal article supplement (PMC8987017; doi:10.3389/fimmu.2022.829228), 2022-03-24
Supplement: Image_1.pdf [file Image_1.pdf]

### HLA-A

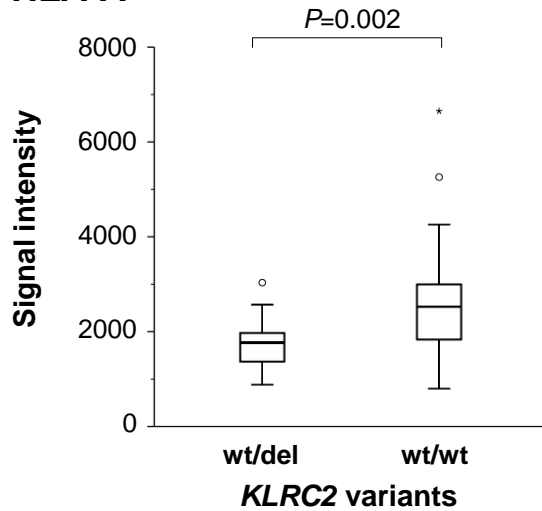

### HLA-B

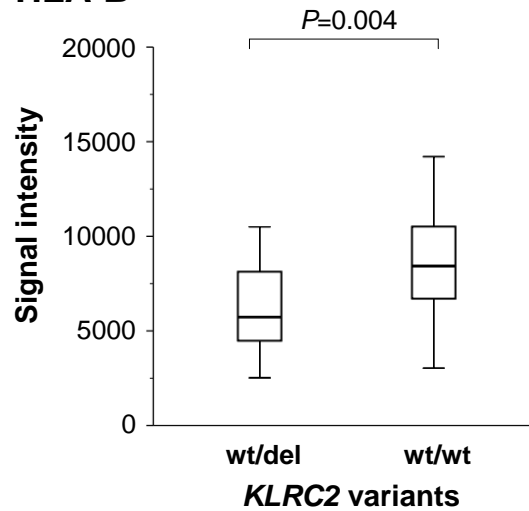

### HLA-C

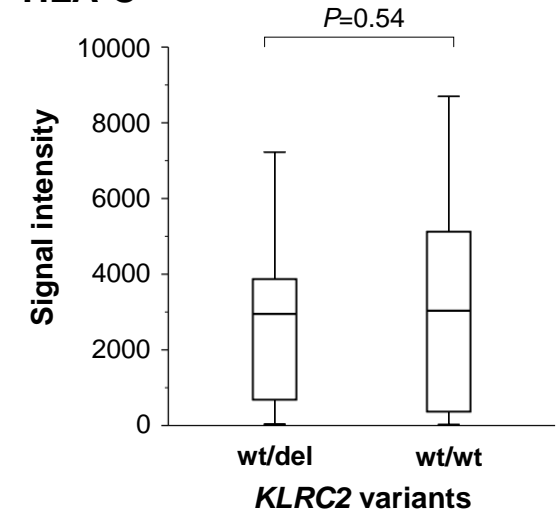

### HLA-DRB1

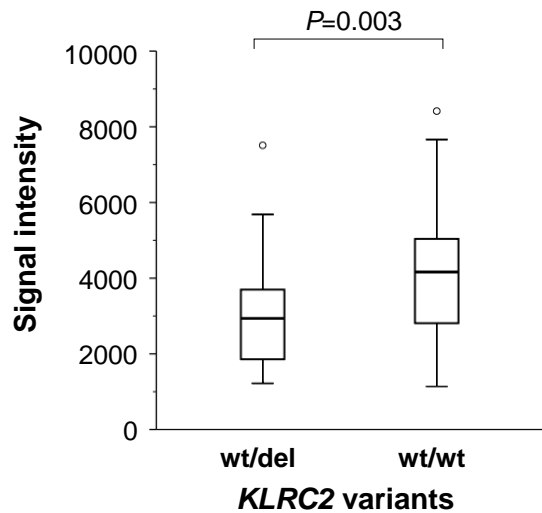

### HLA-DQB1

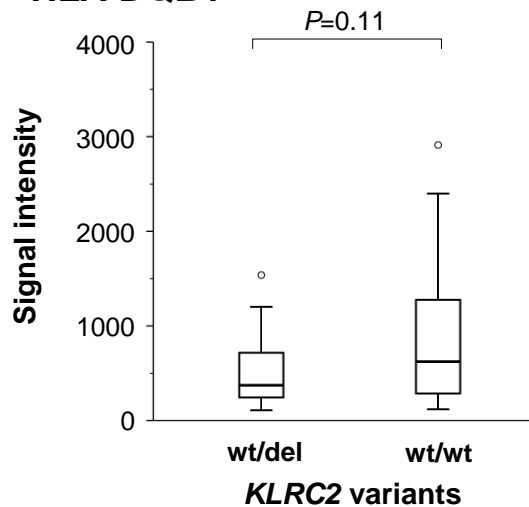

### HLA-DPB1

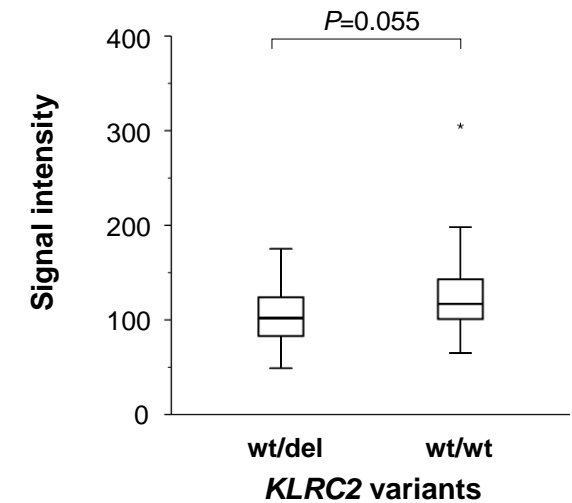

**Supplemental Figure 1.** *KLRC2* polymorphism in the DSA+ BORTEJECT cohort in relation to intragraft HLA class I (HLA-A, HLA-B and HLA-C) and HLA class II (HLA-DRB1, HLA-DQB1, HLA-DPB1) transcript expression (microarray signal intensity).
