# Supplementary material for: Deletion of the Natural Killer Cell Receptor NKG2C Encoding KLR2C Gene and Kidney Transplant Outcome
Source: PubMed Central journal article supplement (PMC8987017; doi:10.3389/fimmu.2022.829228), 2022-03-24
Supplement: Image_2.pdf [file Image_2.pdf]

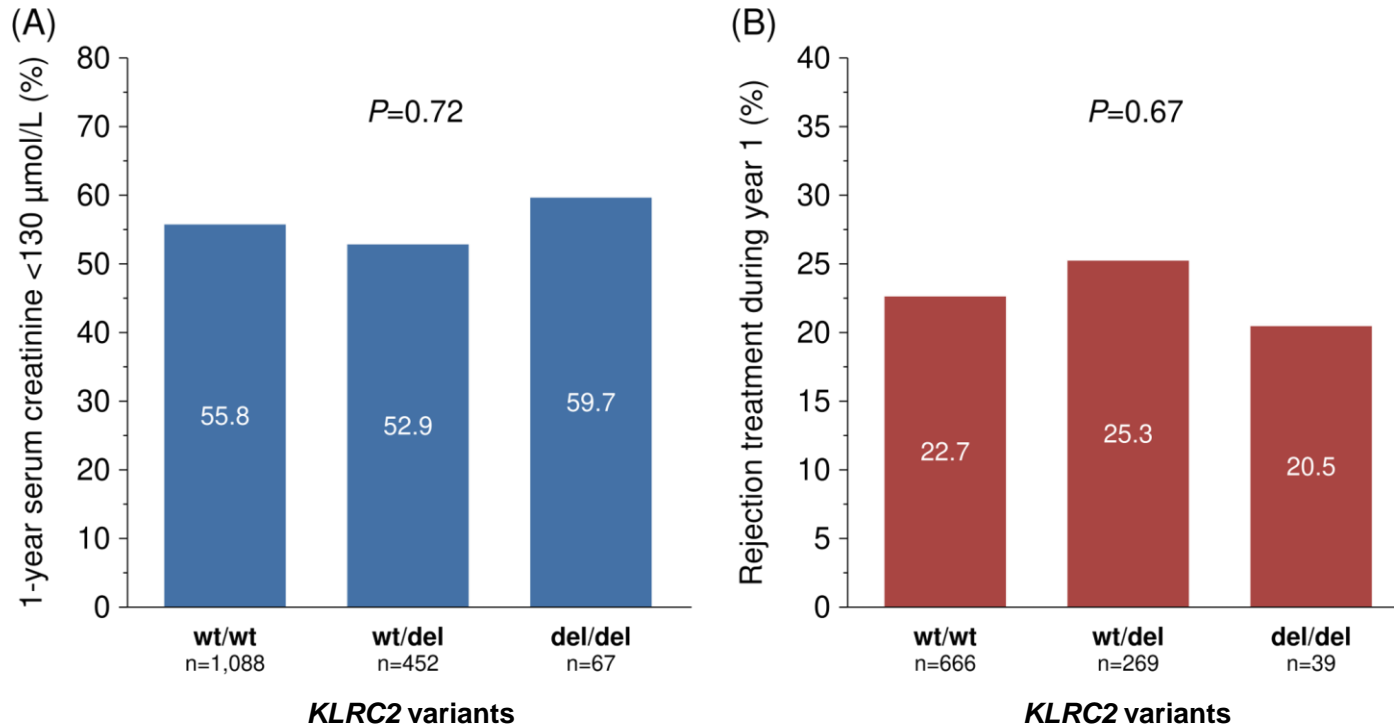

**Supplemental Figure 2.** *KLRC2* polymorphism in the CTS cohort in relation to 1-year serum creatinine (A; total 1,607 recipients) and treated rejection episodes within the first year after transplantation (B; total 974 recipients).
