# Supplementary material for: Deletion of the Natural Killer Cell Receptor NKG2C Encoding KLR2C Gene and Kidney Transplant Outcome
Source: PubMed Central journal article supplement (PMC8987017; doi:10.3389/fimmu.2022.829228), 2022-03-24
Supplement: Table_1.pdf [file Table_1.pdf]

**SUPPLEMENTAL TABLE 1. Baseline characteristics – DSA+ versus DSA– transplant cohorts (BORTEJECT)**

| Parameters                                                     | DSA+ (study patients)<br>n=86 | DSA– (matched control) <sup>a</sup><br>n=106 | P - value |
|----------------------------------------------------------------|-------------------------------|----------------------------------------------|-----------|
| <b>Characteristics obtained at the time of transplantation</b> |                               |                                              |           |
| Female sex, n (%)                                              | 39 (45)                       | 45 (43)                                      | 0.77      |
| Recipient age (years), median (IQR)                            | 47 (36-54)                    | 48 (38-56)                                   | 0,63      |
| First renal allograft, n (%)                                   | 61 (71)                       | 69 (65)                                      | 0.44      |
| Living donor transplantation, n (%)                            | 14 (16)                       | 18 (17)                                      | >0.99     |
| Donor age (years) <sup>b</sup> , median (IQR)                  | 46 (35-58)                    | 48 (35-56)                                   | 0.99      |
| Cold ischemia time (hours) <sup>b</sup> , median (IQR)         | 12 (9-17)                     | 13 (9-18)                                    | 0.25      |
| HLA mismatch (A, B, DR) <sup>b</sup> , median (IQR)            | 3 (2-4)                       | 3 (2-4)                                      | 0.98      |
| CDC-PRA ≥0% <sup>b</sup> , n (%)                               | 30 (37)                       | 39 (39)                                      | 0.88      |
| Preformed DSA <sup>c</sup> , n (%)                             | 25 (60)                       | 19 (40)                                      | 0.09      |
| ABO-incompatible living donor transplant <sup>d</sup> , n (%)  | 1 (1)                         | 0 (0)                                        | 0.45      |
| Recipient desensitization, n (%)                               | 26 (30)                       | 19 (18)                                      | 0.059     |
| CDC crossmatch conversion, n (%)                               | 8 (9)                         | 4 (4)                                        | 0.14      |
| <b>Characteristics obtained at the time of ABMR screening</b>  |                               |                                              |           |
| Time to screening (years), median yrs (IQR)                    | 4.9 (1.9–12.8)                | 5.9 (2.9–10.6)                               | 0.67      |
| Serum creatinine (mg/dL), median (IQR)                         | 1.6 (1.2–2.1)                 | 1.4 (1.2–1.9)                                | 0.11      |
| eGFR (mL/min/1.73m <sup>2</sup> ), median (IQR)                | 54 (32–79)                    | 63 (39–88)                                   | 0.074     |
| Urinary protein/creatinine ratio (mg/g), median (IQR)          | 192 (79–445)                  | 156 (83–453)                                 | 0.84      |
| <b>Maintenance immunosuppression</b>                           |                               |                                              |           |
| Triple immunosuppression                                       | 65 (76)                       | 81 (76)                                      | >0.99     |
| Dual immunosuppression                                         | 21 (24)                       | 25 (24)                                      | >0.99     |
| Tacrolimus                                                     | 52 (60)                       | 76 (72)                                      | 0.12      |

|                   |         |         |       |
|-------------------|---------|---------|-------|
| Cyclosporine A    | 29 (34) | 25 (24) | 0.15  |
| mTOR Inhibitor    | 4 (5)   | 3 (3)   | 0.70  |
| Belatacept        | 1 (1)   | 1 (1)   | >0.99 |
| Mycophenolic acid | 71 (83) | 85 (80) | 0.71  |
| Azathioprine      | 5 (6)   | 8 (8)   | 0.78  |
| Steroids          | 75 (88) | 92 (87) | >0.99 |

CDC, complement-dependent cytotoxicity; DSA, donor-specific antibody; eGFR, estimated glomerular filtration rate; HLA, human leukocyte antigen; IQR, interquartile range; mTOR, mammalian target of rapamycin; PRA, panel-reactive antibody.

<sup>a</sup>The cohort of DSA– recipients was propensity score matched to DSA+ study patients (variables: female sex, recipient age, urinary protein/creatinine ratio, prior transplantation, HLA mismatch and cytotoxic panel reactivity).

<sup>b</sup>Donor age, cold ischemia time, HLA mismatch and CDC panel reactivity were not recorded for 3, 5, 1 and 5 DSA+ and 1, 8, 1 and 5 DSA– recipients, respectively.

<sup>c</sup>Pre-transplant single antigen testing was available for 42 DSA+ and 47 DSA– patients (solid-phase HLA antibody screening on the wait list according to our local standard implemented in July 2009). Pre-sensitized patients (until 2009: ≥40% CDC-PRA; since 2009: preformed DSA) were subjected to a protocol of peri-transplant immunoadsorption as earlier detailed.

<sup>d</sup>This patient underwent desensitization for ABO (AB donor to O recipient) plus HLA antibody (DSA+) barriers.
